# Supplementary material for: Self-assembly of Dawson-type H6P2W18O62@[Cu6O(TZI)3(H2O)6]4 for high-performance aerobic oxidation desulfurization of fuel
Source: Royal Society of Chemistry journal article supplement (doi:10.1039/d4dt01568a), 2024-01-01
Supplement: d4dt01568a1.pdf [file d4dt01568a1.pdf]

# Supplementary Information

## Self-assembly of Dawson-type

## $\text{H}_6\text{P}_2\text{W}_{18}\text{O}_{62}@\text{[Cu}_6\text{O(TZI)}_3(\text{H}_2\text{O})_6\text{]}_4$ towards high performance of aerobic oxidation desulfurization of fuel

Wenjia Qu, Pengpeng Wei, Jingfang Li\*, Liye Liang, Liqiang Ma, Guangming Li\*

Key Laboratory of Functional Inorganic Material Chemistry (MOE), School of Chemistry and Materials Science, Heilongjiang University, Harbin 150080, Heilongjiang, China.

E-mail: [fjlaaa.ok@163.com](mailto:fjlaaa.ok@163.com) (J. Li); [gmlj@hlju.edu.cn](mailto:gmlj@hlju.edu.cn) (G. Li)

**Table S1.** Crystal data and structure refinements for  $\text{D-P}_2\text{W}_{18}@\text{rht-MOF-1}$

| Parameters                                    | $\text{D-P}_2\text{W}_{18}@\text{rht-MOF-1}$                                              |
|-----------------------------------------------|-------------------------------------------------------------------------------------------|
| Empirical formula                             | $\text{C}_{36}\text{H}_{84}\text{Cu}_8\text{N}_{16}\text{O}_{113}\text{P}_2\text{W}_{18}$ |
| CCDC No.                                      | 2005522                                                                                   |
| Formula weight                                | 6428.75                                                                                   |
| Crystal system                                | cubic                                                                                     |
| Space group                                   | <i>Fmm</i>                                                                                |
| Unit cell                                     | $a=b=c=44.4562(1)\text{Å}$<br>$\alpha=\beta=\gamma=90^\circ$                              |
| Volume                                        | $87861.2(6)\text{Å}^3$                                                                    |
| <i>Z</i>                                      | 24                                                                                        |
| Density (calcd)                               | $2.916\text{ g/cm}^3$                                                                     |
| Temperature                                   | 100.00 (2) K                                                                              |
| Wavelength                                    | 0.71073 Å                                                                                 |
| Reflections collected                         | 77508                                                                                     |
| $\mu$                                         | $15.338\text{ mm}^{-1}$                                                                   |
| <i>F</i> (000)                                | 69840.0                                                                                   |
| Final $R_1^a$ , $wR_2^b$ [ $I > 2\sigma(I)$ ] | 0.0753, 0.2121                                                                            |
| Final $R_1^a$ , $wR_2^b$ (all data)           | 0.0807, 0.2172                                                                            |
| GOF on $F^2$                                  | 1.087                                                                                     |

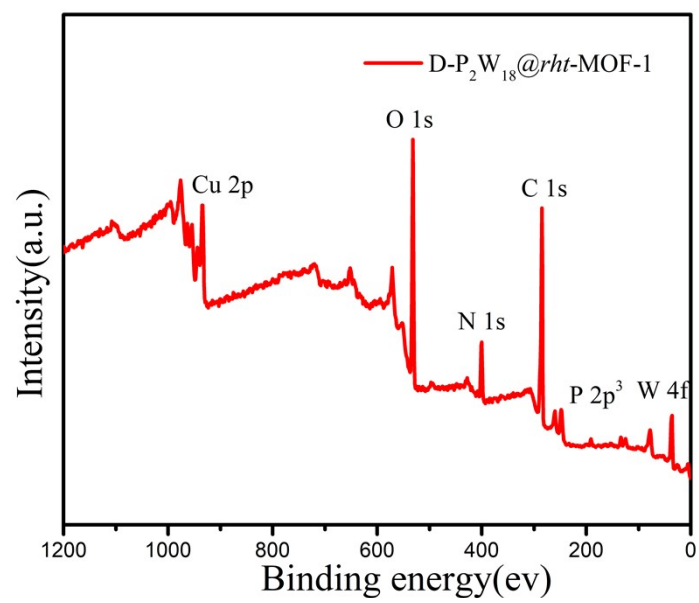

**Fig. S1.** XPS fully spectrum for D-P<sub>2</sub>W<sub>18</sub>@rht-MOF-1.
